# Supplementary material
Source: publisher site journal article supplement (https://www.spandidos-publications.com/1157/downloadSupplementary)
Supplement: Supplementary file 1 [file downloadSupplementary]

Figure S1. Mutation status and protein expression levels of p53 in cancer cell lines. (A) Sequencing profiles of the affected exons of the p53 gene with missense mutations. (B) Protein expression of p53 in p53 mutant (H1975, H322 and H157), p53 WT (A549, HCT116) and p53 null (HCT116 p53<sup>-/-</sup>) cell lines by western blot analysis.  $\beta$ -actin was used as a loading control. The HCT116 p53<sup>-/-</sup> cells have no protein expression due to p53 deletion. In H157 cells the non-sense mutation (298stop) results in no expression of p53 protein. Wild-type, WT; c., codon.

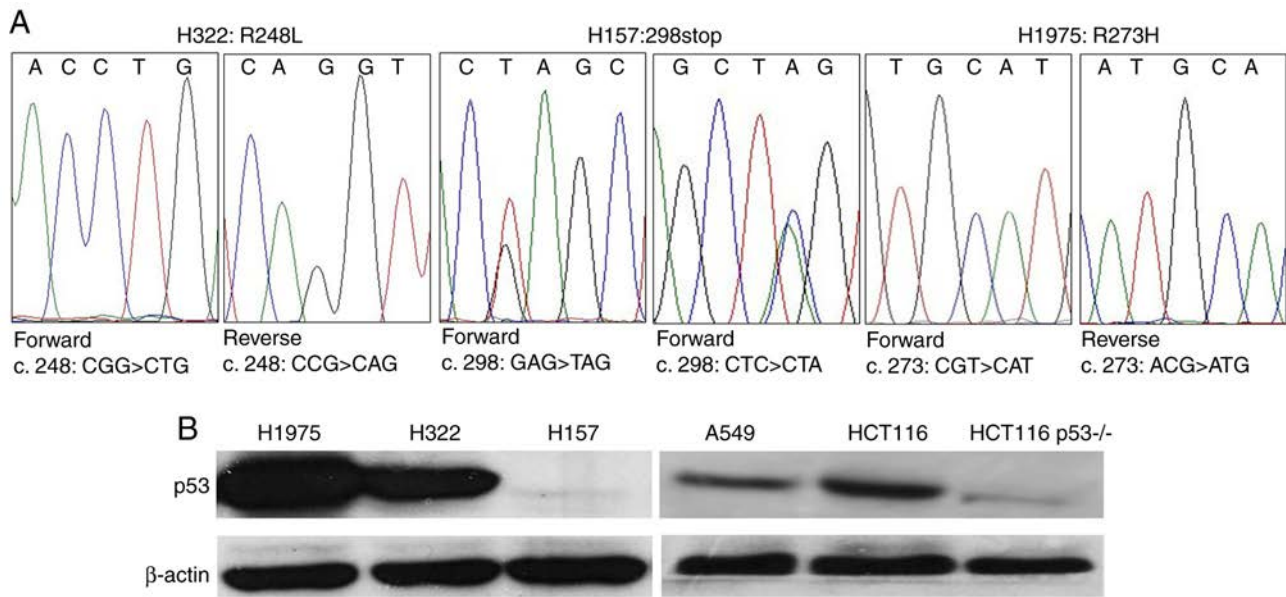

Figure S2. TP53 functionality assay. The protein expression levels of p53, p-p53 and p21 were analysed by western blot analysis, following cell treatment with the p53 inducer doxorubicin.  $\beta$ -actin was used as a loading control.

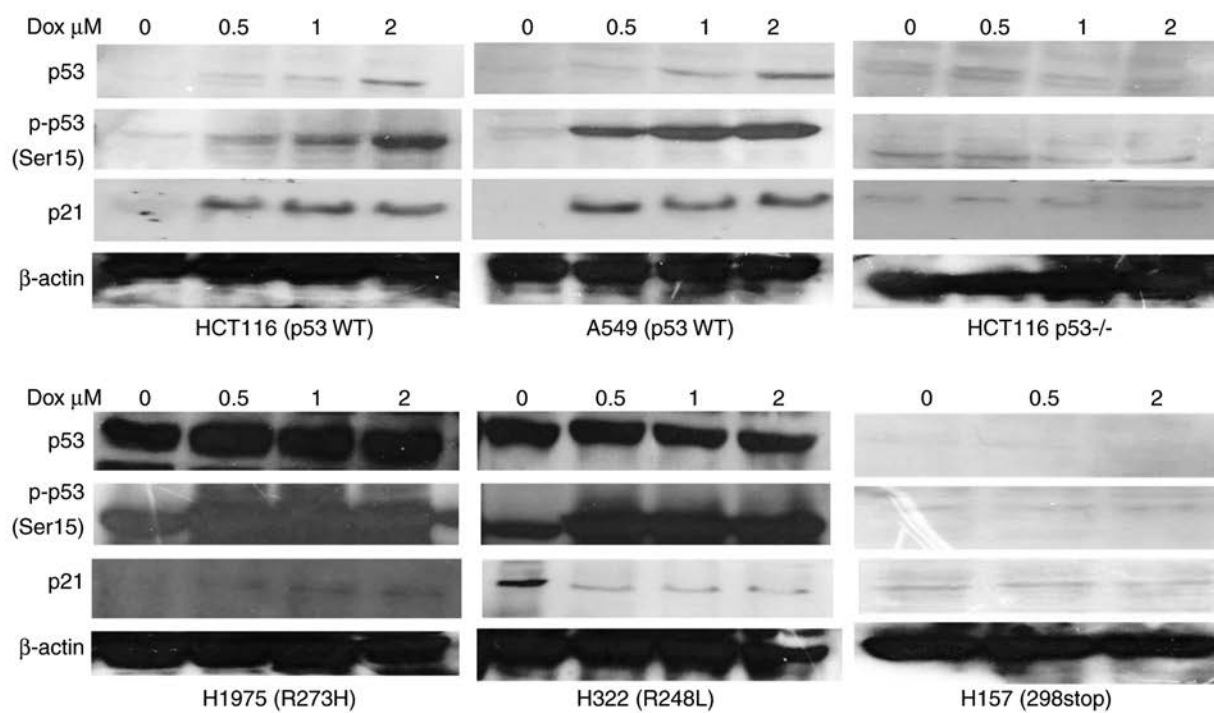

Figure S3. Quantification of western blot analysis of Figure 4C. \*P<0.05, \*\*P<0.01 and \*\*\*P<0.001 following analysis with the Student's t-test.

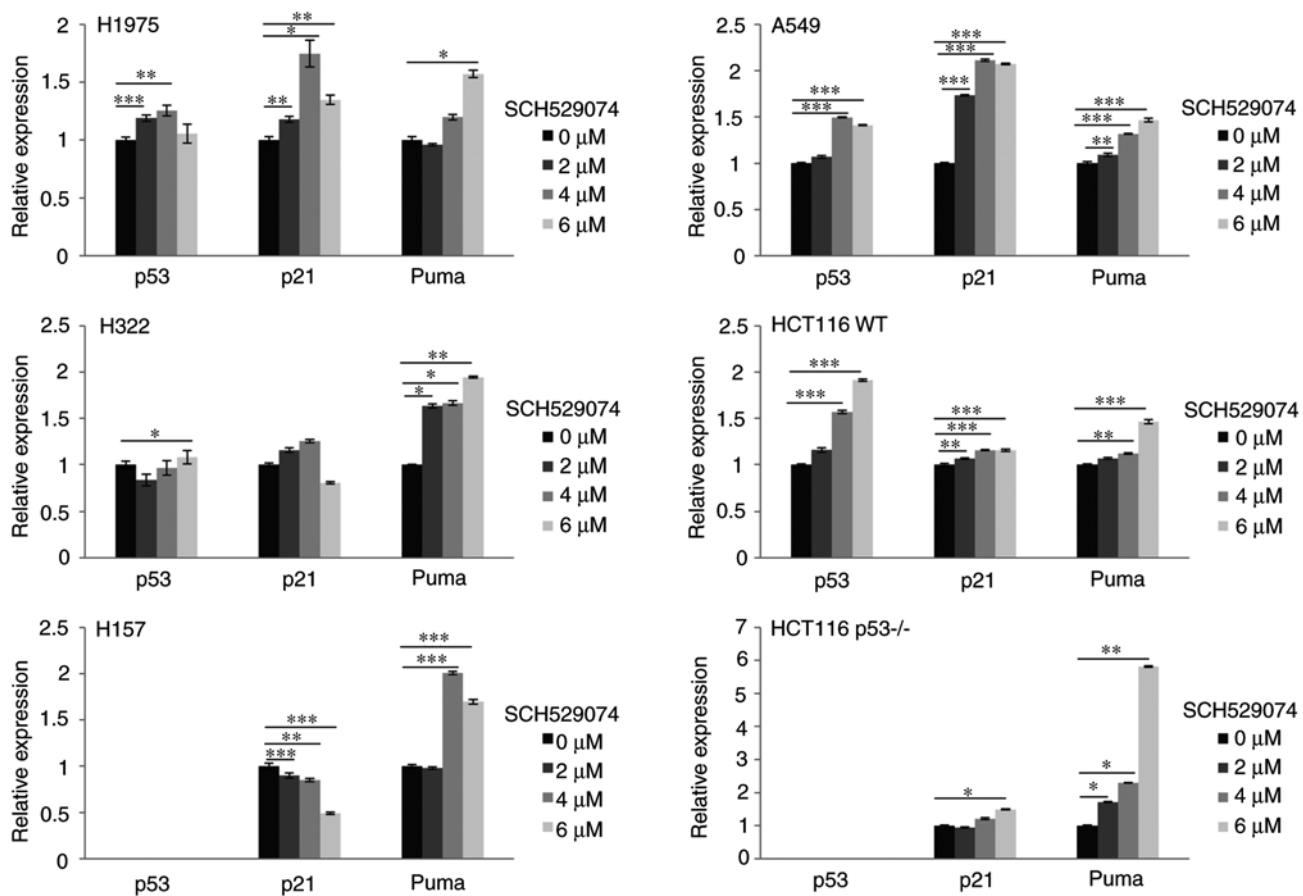

Table SI. Primer sequences.

| Gene                  | Oligonucleotide sequence                                               | T <sub>m</sub> (°C) |
|-----------------------|------------------------------------------------------------------------|---------------------|
| <i>p21</i>            | 5'-AAGACCATGTGGACCTGT-3' (F)<br>5'-GGTAGAAATCTGTCATGCTG-3' (R)         | 57,8                |
| <i>PUMA</i>           | 5'-GACCTCAACGCACAGTA-3' (F)<br>5'-CTAATTGGGCTCCATCT-3' (R)             | 62,8                |
| <i>NOXA</i>           | 5'-GCTGGAAGTCGAGTGTGCTA-3' (F)<br>5'-CCTGAGCAGAAGAGTTTGGA-3' (R)       | 63,2                |
| <i>BAX</i>            | 5'-CCCGAGAGGTCTTTTTCC-3' (F)<br>5'-GCCTTGAGCACCAGTTTG-3' (R)           | 62,1                |
| <i>CCNG2</i>          | 5'-ACTGGAAATTCTCTTGCTAGTTA-3' (F)<br>5'-GATCCAAACCAACTTCTTAAGAT-3'(R)  | 61,1                |
| <i>GAPDH</i>          | 5'-GTGAAGGTCGGAGTCAACG-3' (F)<br>5'-AGGAGGCATTGCTGATGAT-3' (R)         | 60                  |
| p53 mutation analysis |                                                                        |                     |
| Exon 5                | 5'-TGACTTTCAACTCTGTCTCC-3' (F)<br>5'-TCAGTGAGGAATCAGAGGCC-3' (R)       | 60                  |
| Exon 6                | 5'-CTGGAGAGACGACAGGGCTG-3' (F)<br>5'-CCAGAGACCCCAGTTGCAAAC-3' (R)      | 60                  |
| Exon 7                | 5'-CTCGCGCACTGGCCTCATCTT-3' (F)<br>5'-TCAGCGGCAAGCAGAGGCTG-3' (R)      | 60                  |
| Exon 8                | 5'-GGACAGGTAGGACCTGATTCCTTAC-3' (F)<br>5'-TGCACCCTTGGTCTCCTCCAC-3' (R) | 60                  |
| Exon 9                | 5'-GGTGGAGGAGACCAAGGGTGCATT-3' (F)<br>5'-CTGGAAACTTTCCACTTGAT-3' (R)   | 60                  |

T<sub>m</sub>, annealing temperature. F, forward; R, reverse.

Table SII. Antibodies used for western blot analysis.

| Primary and secondary antibodies | Host   | Dilution | Cat. no. | Supplier                         |
|----------------------------------|--------|----------|----------|----------------------------------|
| LC3A/B                           | Rabbit | 1/1,000  | 4108     | Cell Signaling Technology, Inc.  |
| p21                              | Mouse  | 1/200    | sc-6246  | Santa Cruz Biotechnology, Inc.   |
| PUMA                             | Rabbit | 1/200    | sc-28226 | Santa Cruz Biotechnology, Inc.   |
| p53                              | Rabbit | 1/200    | sc-6243  | Santa Cruz Biotechnology, Inc.   |
| p-p53                            | Rabbit | 1/1,000  | 9284P    | Cell Signaling Technology, Inc.  |
| $\beta$ -actin                   | Rabbit | 1/4,000  | A2066    | Sigma Aldrich; Merck KGaA        |
| anti-mouse IgG <sup>a</sup>      | Rabbit | 1/1,000  | P0260    | DAKO; Agilent Technologies, Inc. |
| anti-rabbit IgG <sup>a</sup>     | Goat   | 1/1,000  | sc-2030  | Santa Cruz Biotechnology, Inc.   |

<sup>a</sup>Peroxidase-conjugated.
